# Supplementary material for: Must countries shoulder the burden of mesothelioma to ban asbestos? A global assessment
Source: HighWire-hosted journal article supplement (doi:10.1136/bmjgh-2022-010553), 2022-12-01
Supplement: bmjgh-2022-010553supp001_data_supplement.pdf [file bmjgh-2022-010553supp001_data_supplement.pdf]

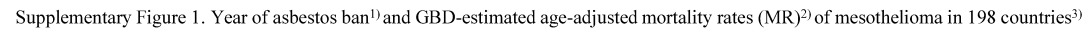

The common name of countries represented by 3 letter country codes are listed in Supplementary Table 1.
